# Supplementary material
Source: Springer Nature journal article supplement (https://www.springermedizin.de/resource/supplementary/13633_2011_12_MOESM1_ESM.pdf/9595450)

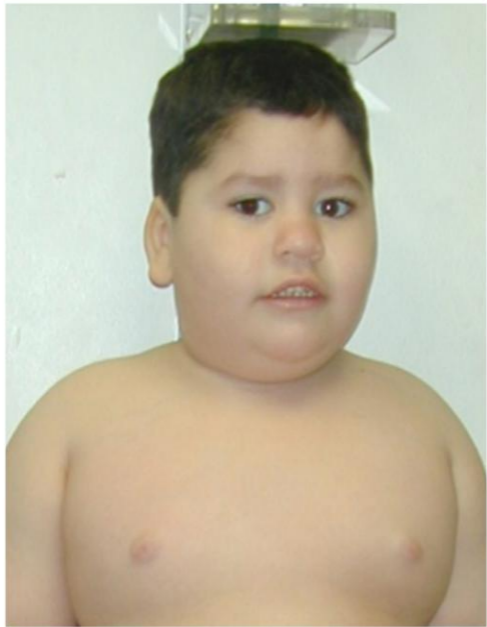

Supplement: MOESM1 [file 9595450]
